# Supplementary material
Source: PubMed Central journal article supplement (PMC4119048)
Supplement: supp_pp.114.243402_243402Figure_S1.pdf [file supp_pp.114.243402_243402Figure_S1.pdf]

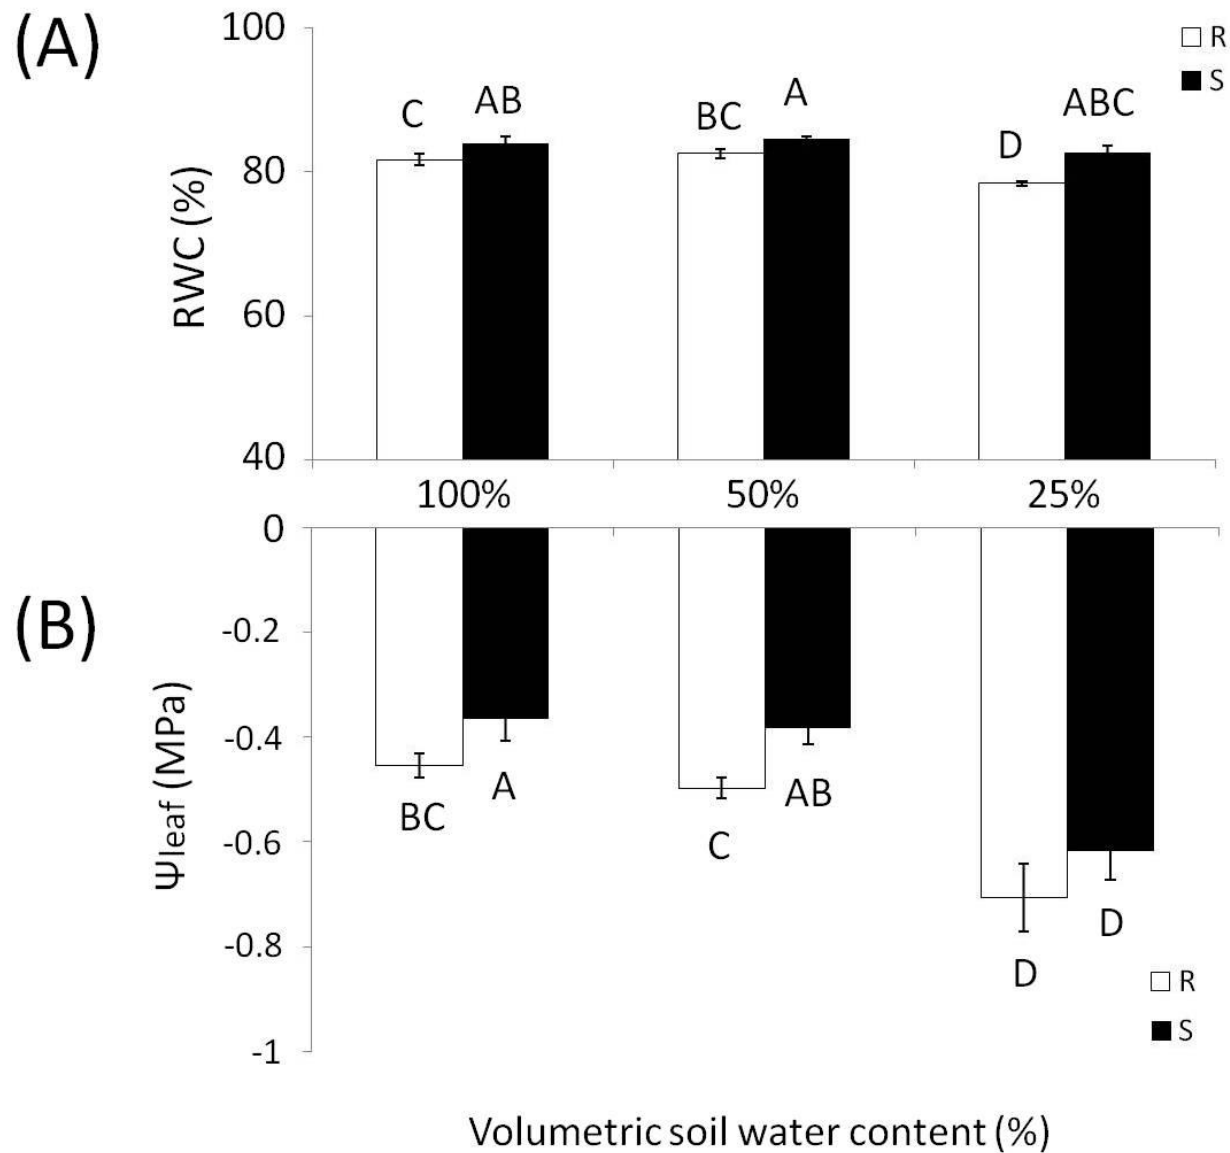

**Figure S1.** Relative water content (RWC) of leaves and leaf water potential ( $\Psi_{\text{leaf}}$ ) at decreasing relative soil volumetric water content (VWC, 100%, 50%, 25%) levels in S (black bars) and R plants (white bars). (A) RWC, (B)  $\Psi_{\text{leaf}}$ . Different letters above the columns indicate significant differences ( $t$  test,  $P < 0.05$ ). Data points are means  $\pm$  SE ( $N = 6$  to  $10$ ).
