# Supplementary material
Source: PubMed Central journal article supplement (PMC4119048)
Supplement: supp_pp.114.243402_243402Figure_S2.pdf [file supp_pp.114.243402_243402Figure_S2.pdf]

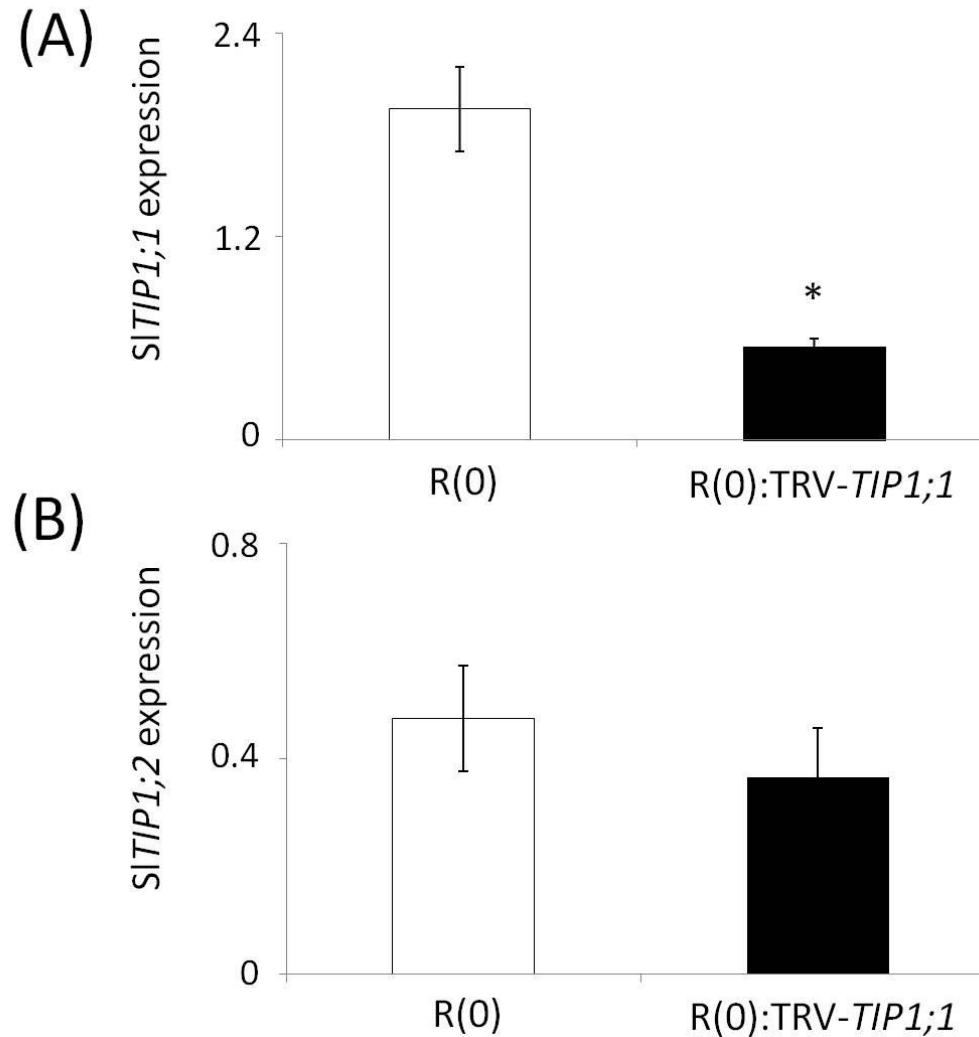

**Figure S2.** *SITIP1;1* and *SITIP1;2* expression in R(0) plants (white bar) and R(0):TRV-*TIP1;1* plants (black bar) as measured by qPCR. (A) Expression level *SITIP1;1* (B) Expression level *SITIP1;2*. \* indicates a significant difference (*t* test,  $P < 0.05$ ). Data points are means  $\pm$  SE (N = 4 to 6).
