# Supplementary material
Source: PubMed Central journal article supplement (PMC4119048)
Supplement: supp_pp.114.243402_243402Figure_S3.pdf [file supp_pp.114.243402_243402Figure_S3.pdf]

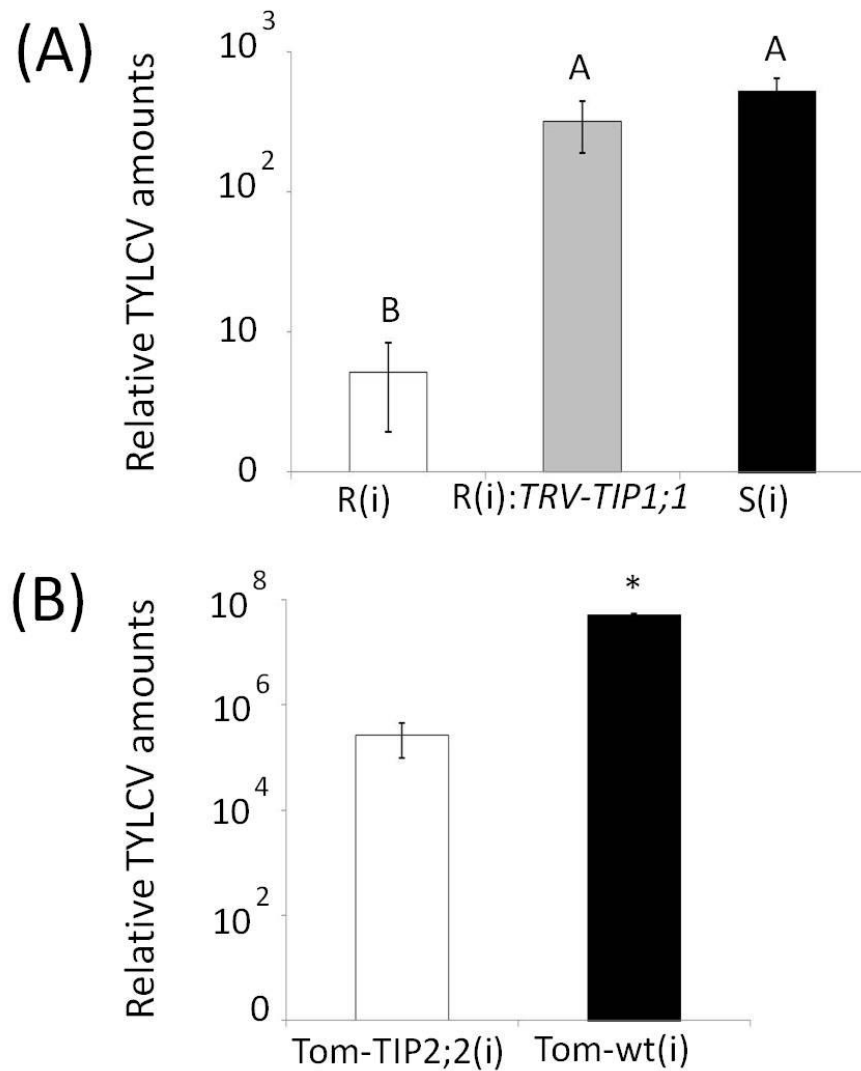

**Figure S3.** . Effects of the expression of the tomato genes *TIP1;1* and *TIP2;2* on TYLCV infection of tomato plants at 21 dpi. The relative amounts of viral DNA in infected leaves were estimated by qPCR using the tomato  $\beta$ -actin gene as calibrator. (A) R line [R(i), white bar], R line with silenced *TIP1;1* [R(i):TRV-*TIP1;1*, gray bar], S line [S(i), black bar]; (B) transgenic tomato plants expressing the tomato *TIP2;2* gene [Tom-STIP2;2(i), white bar], same non-transgenic genotype [Tom-wt(i), black bar]. Different letters above the columns indicate significant differences (t test,  $P < 0.05$ ). \* indicates a significant difference (t test,  $P < 0.05$ ). Data points are means  $\pm$  SE (N = 7).
