# Supplementary material
Source: PubMed Central journal article supplement (PMC4119048)
Supplement: supp_pp.114.243402_243402Figure_S4.pdf [file supp_pp.114.243402_243402Figure_S4.pdf]

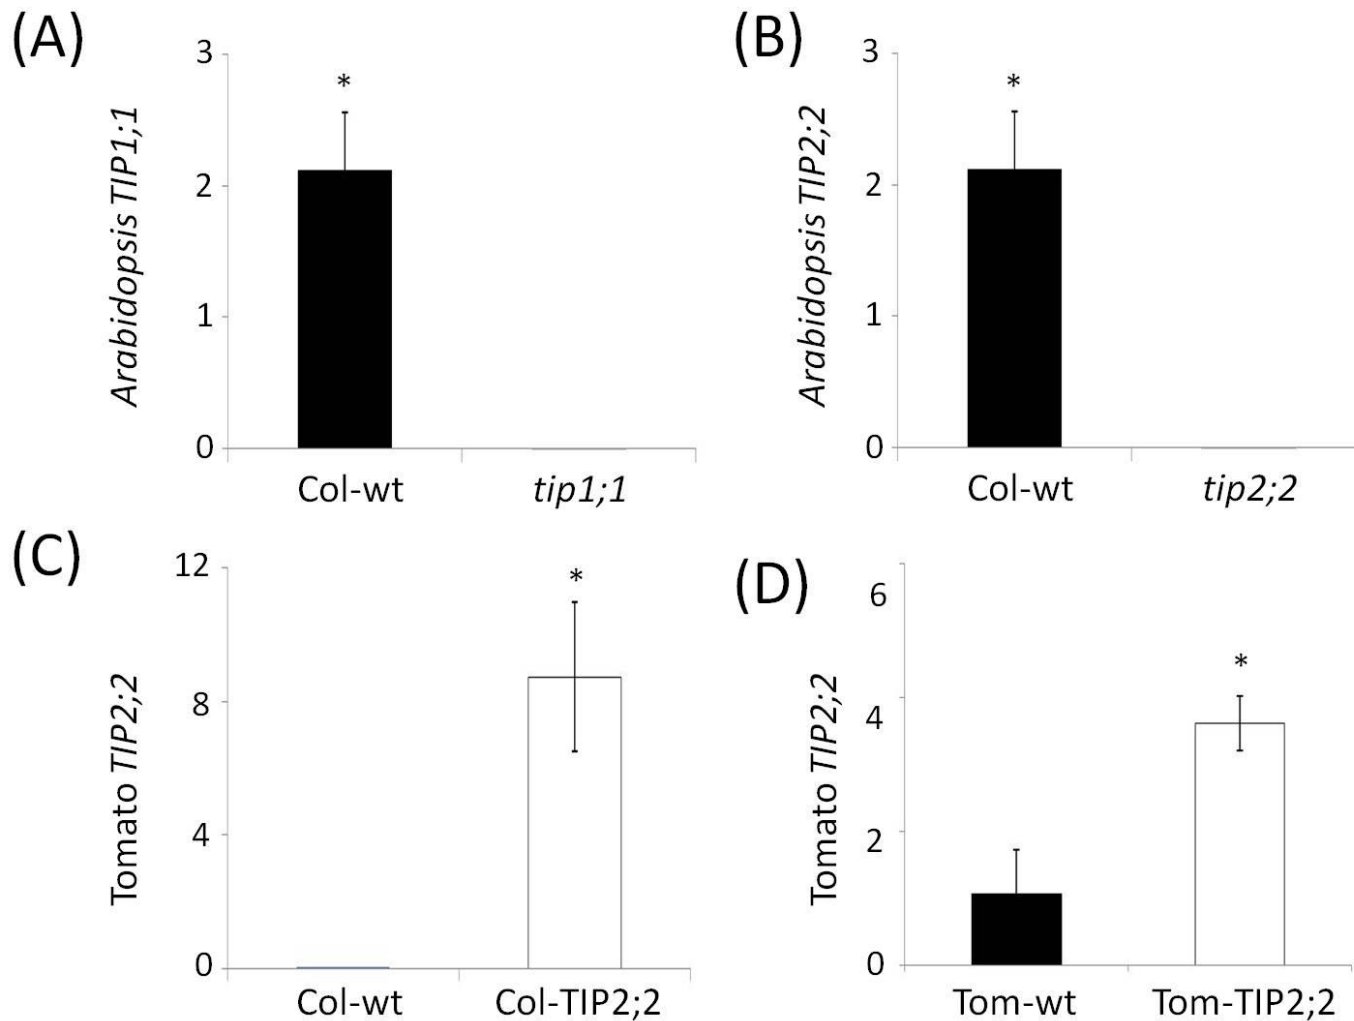

**Figure S4.** Relative expression levels of the *Arabidopsis TIP1;1*, *Arabidopsis TIP2;2* and tomato *TIP2;2* genes in plants with different genotypes. (A) Expression levels of *Arabidopsis TIP1;1* in knock-out mutants (*tip1;1*) and in wild-type plants (Col-wt). (B) Expression levels of *Arabidopsis TIP2;2* in knock-out mutants (*tip2;2*) and in wild-type plants (Col-wt). (C) Expression levels of tomato *TIP2;2* in transgenic *Arabidopsis* expressing *TIP2;2* (Col-TIP2;2) and in wild-type plants (Col-wt). (E) Expression levels of tomato *TIP2;2* in over-expressing tomato (Tom-TIP2;2) and in wild-type plants (Tom-wt). Tomato  $\beta$ -actin and *Arabidopsis Actin2* were used as calibrator genes. \* indicates a significant difference (t test, P < 0.05). Data points are means  $\pm$  SE (N = 5 to 7).
