# Supplementary material
Source: PubMed Central journal article supplement (PMC4119048)
Supplement: supp_pp.114.243402_243402Figure_S5.pdf [file supp_pp.114.243402_243402Figure_S5.pdf]

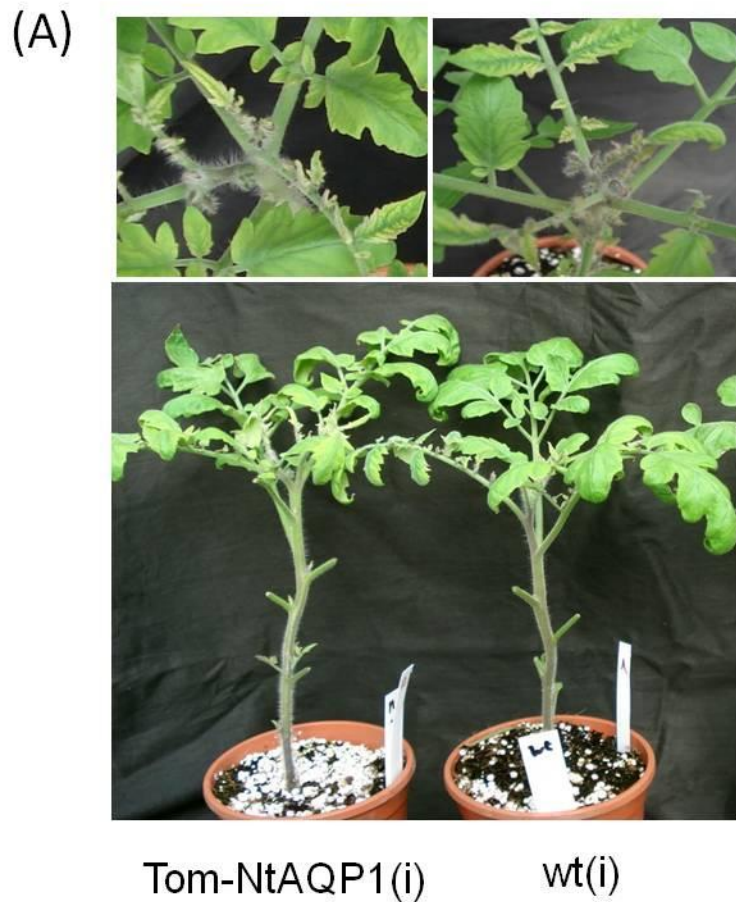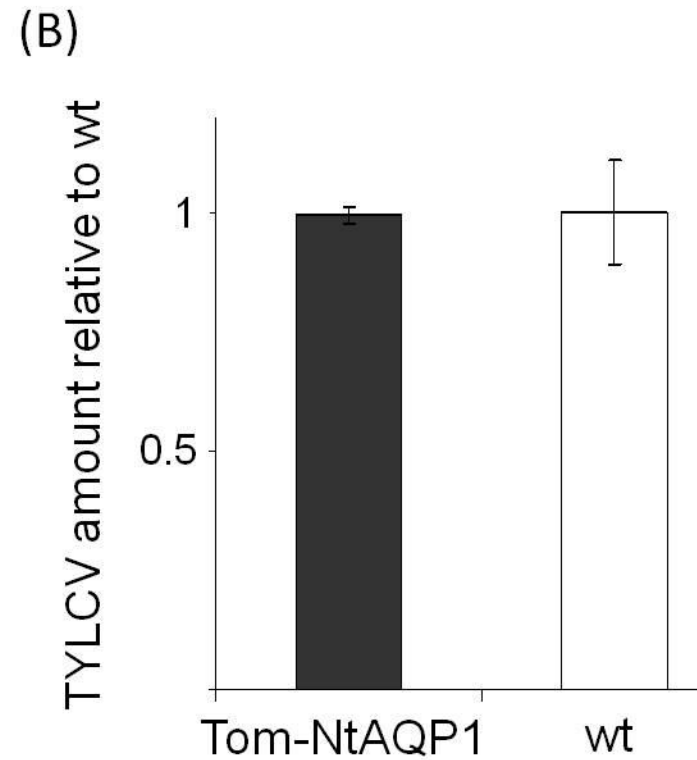

**Figure S5.** Effect of the expression of the *Nicotiana tabacum* plasma membrane AQP gene *NtAQP1* on TYLCV infection of tomato plants transformed with *NtAQP1* (Tom-NtAQP1 plants), as compared with non-transgenic tomato plants (wt). (A) Tomato symptoms at 30 dpi: Tom-NtAQP1 plants showed symptoms similar to those observed in wt. (B) qPCR estimation of relative amounts of TYLCV in tomato plants at 21 dpi. Tom-NtAQP1 (black bar) and wt tomato plants (white bar); the tomato  $\beta$ -actin gene was used as calibrator. Data points are means  $\pm$  SE ( $N = 7$ ).
