# Supplementary material
Source: PubMed Central journal article supplement (PMC4119048)
Supplement: supp_pp.114.243402_243402Figure_S6.pdf [file supp_pp.114.243402_243402Figure_S6.pdf]

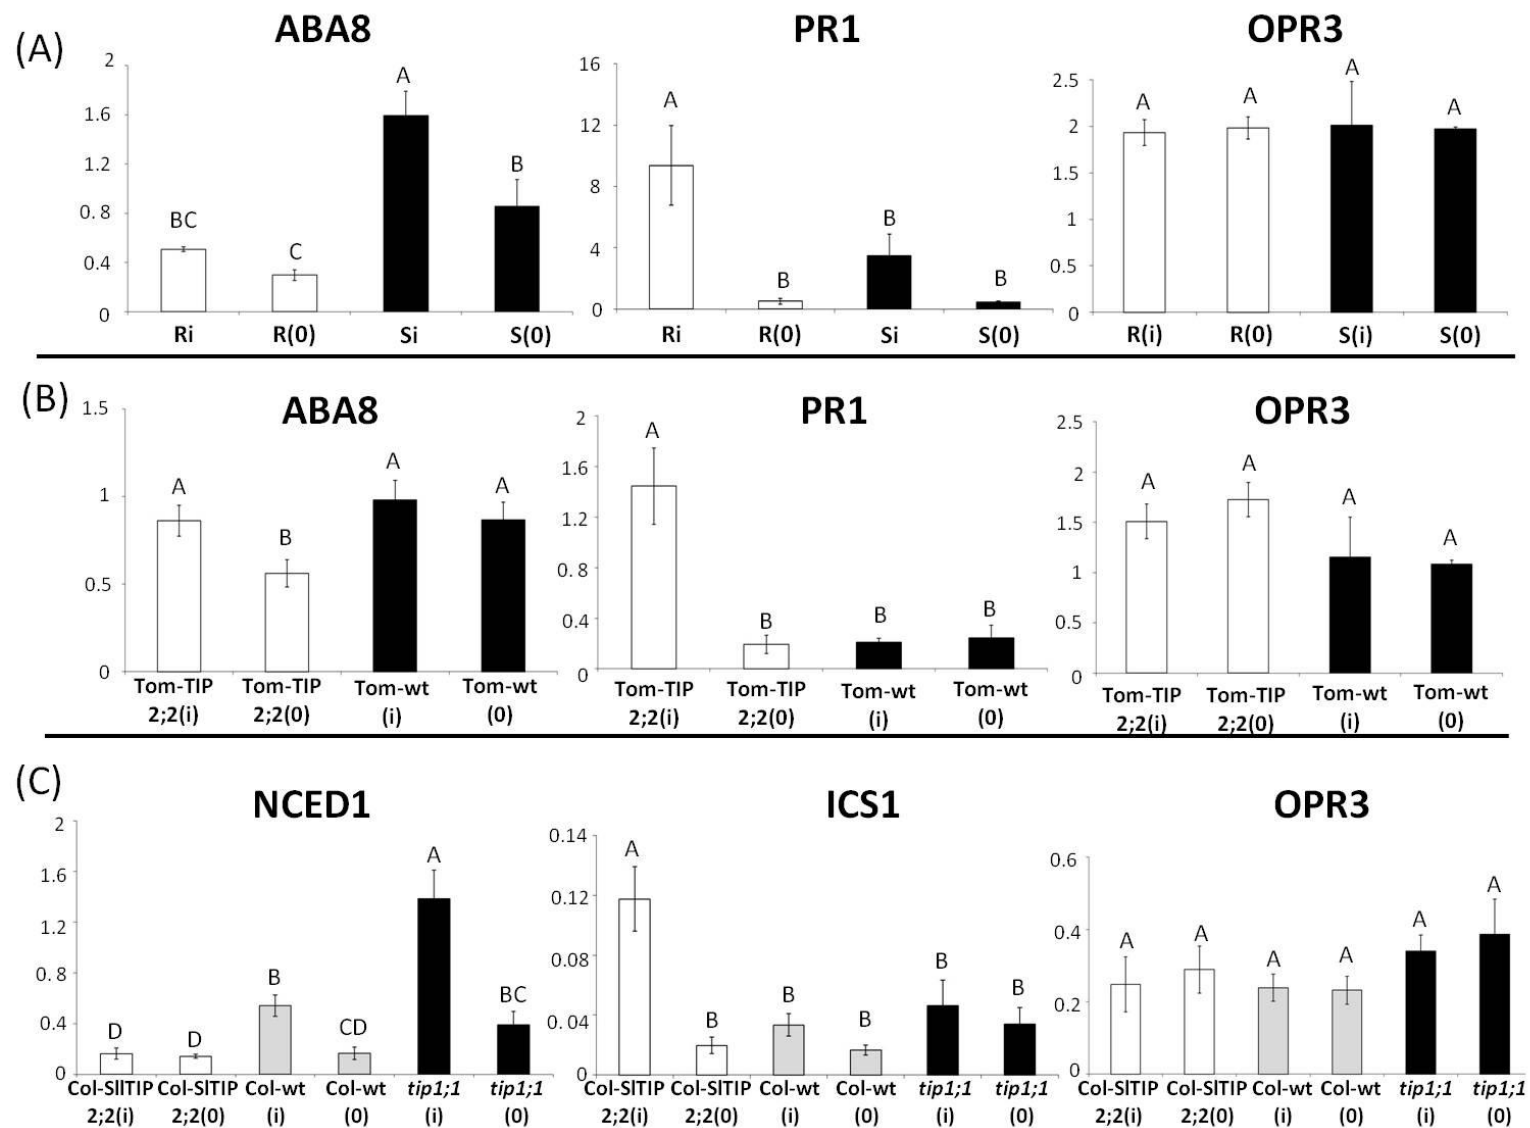

**Figure S6.** Expression of hormone-related marker and biosynthesis genes (ABA: *ABA8*, *AtNCED1*; SA: *PR1*, *AtICS1* and JA: *OPR3*, *AtOPR3*) in tomato and *Arabidopsis* plants at 7 dpi. (A) Tomato resistant line R (white bar) and susceptible line S (black bar); i = infected, 0 = uninfected. (B) Tom-TIP2;2 tomato plants (white bar) and Tom-wt (black bar). (C) *Arabidopsis* Col-SITIP2;2 (white bar) and Col-wt (gray bar), and *tip1;1* mutant plants (black bar). i = infected, 0 = uninfected. Data points are means  $\pm$  SE ( $N = 4$  to  $7$ ). Different letters above the columns indicate significant differences ( $t$  test,  $P < 0.05$ ).
