# Supplementary material
Source: PubMed Central journal article supplement (PMC4119048)
Supplement: supp_pp.114.243402_243402Figure_S7.pdf [file supp_pp.114.243402_243402Figure_S7.pdf]

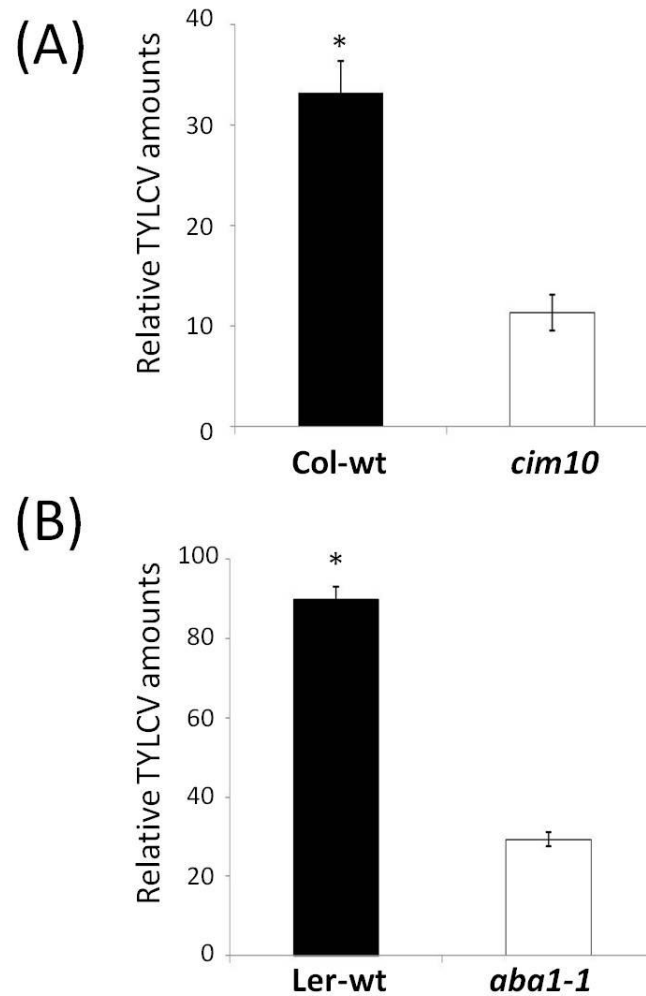

**Figure S7.** Effects of hormone levels on TYLCV infection of *Arabidopsis* mutants at 7dpi. (A) qPCR estimation of relative amounts of TYLCV in *Arabidopsis* transgenic lines that activate SA defenses (*cim10*) (B) qPCR estimation of relative amounts of TYLCV in *Arabidopsis* ABA deficient mutant (*aba1*). *Arabidopsis UBQ10* was used as calibrating gene. Different letters above the columns indicate significant differences (*t* test,  $P < 0.05$ ). \* indicates a significant difference (*t* test,  $P < 0.05$ ). Data points are means  $\pm$  SE ( $N = 3$  to 6).
