# Supplementary material
Source: PubMed Central journal article supplement (PMC4119048)
Supplement: supp_pp.114.243402_243402Figure_S8.pdf [file supp_pp.114.243402_243402Figure_S8.pdf]

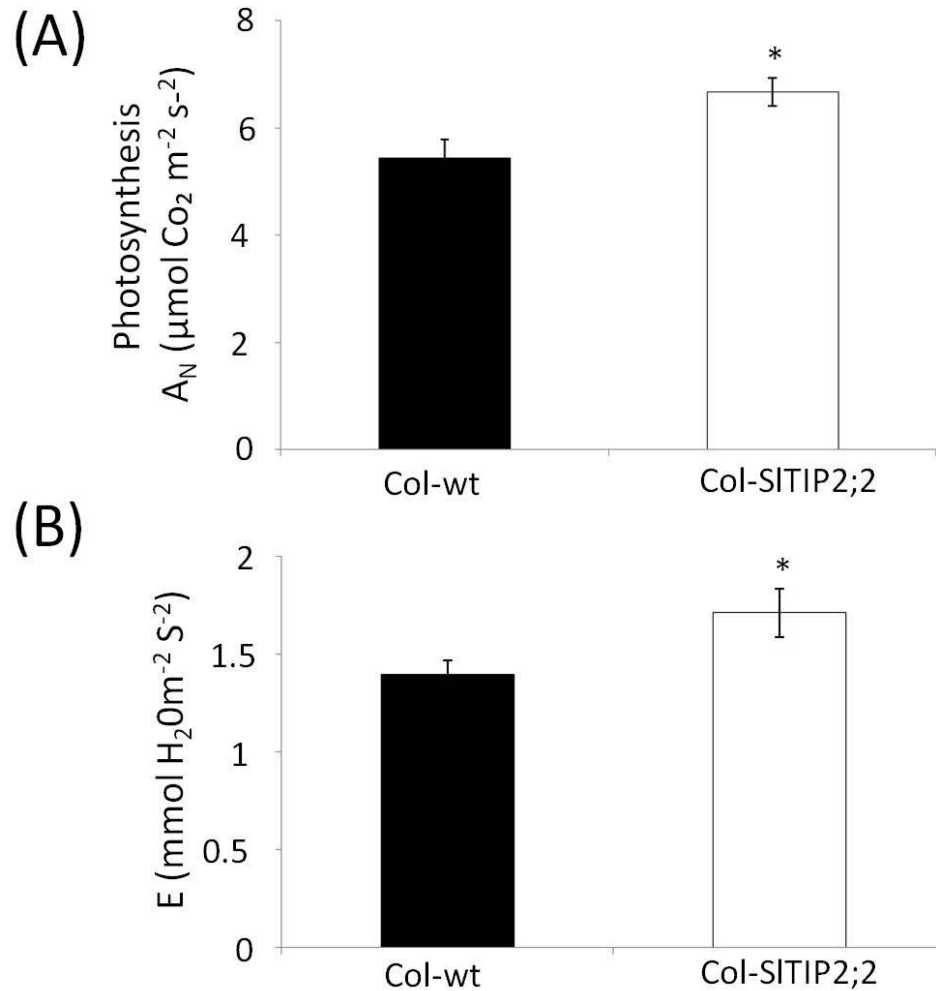

**Figure S8.**

Photosynthesis and transpiration of wild-type *Arabidopsis* plants (Col-wt, black bar) and *Arabidopsis* plants expressing *SITIP2;2* (white bar) under normal irrigation as determined at 1200 mmol photons  $\text{m}^{-2} \text{s}^{-1}$ , ca. 40% relative humidity, 25°C and 400  $\mu\text{mol CO}_2 \text{ mol}^{-1}$ . (A) Photosynthesis. (B) transpiration. \* indicates a significant difference (*t* test,  $P < 0.05$ ). Data points are means  $\pm$  SE ( $N = 7$ ).
